# Supplementary material for: Enhanced photothermal-ferroptosis effects based on RBCm-coated PDA nanoparticles for effective cancer therapy
Source: Royal Society of Chemistry journal article supplement (doi:10.1039/d2tb02329f), 2022-12-13
Supplement: d2tb02329f1.pdf [file d2tb02329f1.pdf]

## ***Enhanced Photothermal-Ferroptosis effects based on RBCm-coated PDA nanoparticles for effective cancer therapy***

Hongli Yu<sup>1</sup>, Jianqin Yan<sup>1</sup>, Zhipeng Li<sup>1</sup>, Tingting Song<sup>1</sup>, Fang Ning<sup>1</sup>, Jinshan Tan<sup>2</sup>, Yong Sun<sup>1\*</sup>.

<sup>1</sup>Department of Pharmaceutics, School of Pharmacy, Qingdao University, Qingdao 266021, China.

<sup>2</sup>State Key Laboratory of Bio-Fibers and Eco-Textiles, Qingdao University, Qingdao 266071, China.

\* Correspondence: Yong Sun, Email [sunyong@qdu.edu.cn](mailto:sunyong@qdu.edu.cn), Tel 0086-532-82991203.

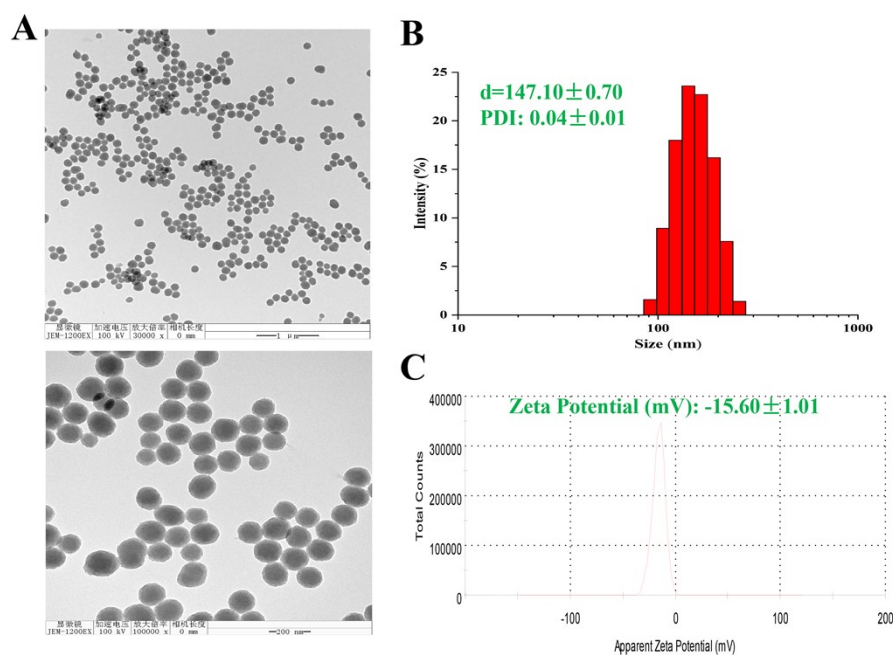

Figure S1. TEM images of (A) Fe-PDA NPs (B) Average size and (C) Zeta potential of Fe-PDA NPs.

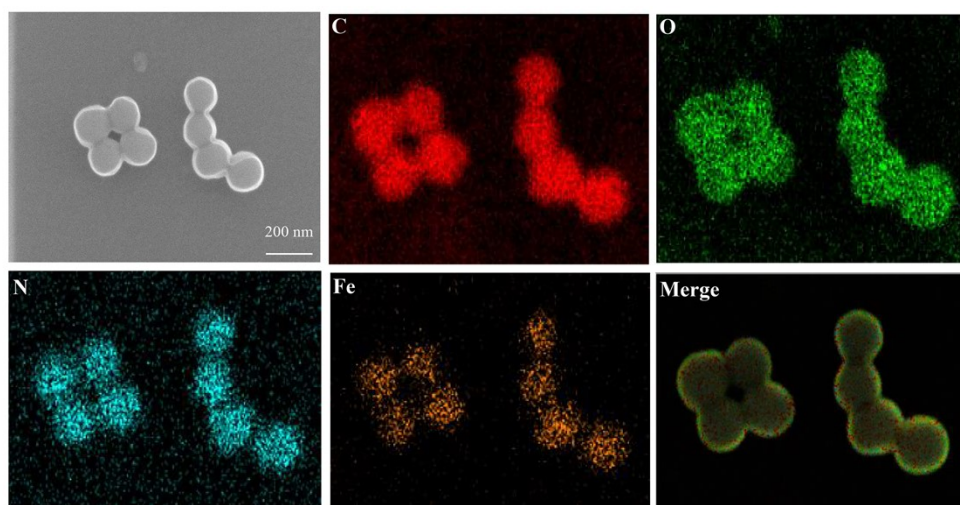

Figure S2. Elemental mapping images of C, O, N, and Fe.

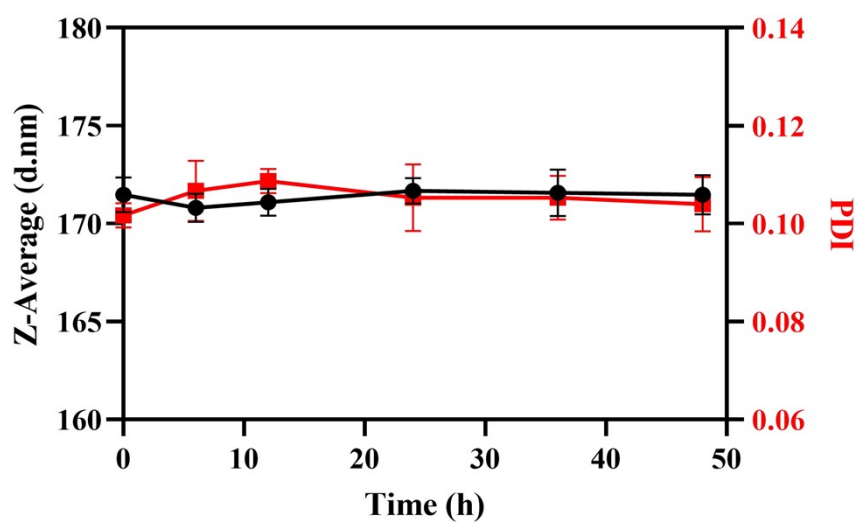

Figure S3. Size distribution analysis of Fe-PDA-EPI@FA-RBCm NPs incubated in the FBS for 48 h.

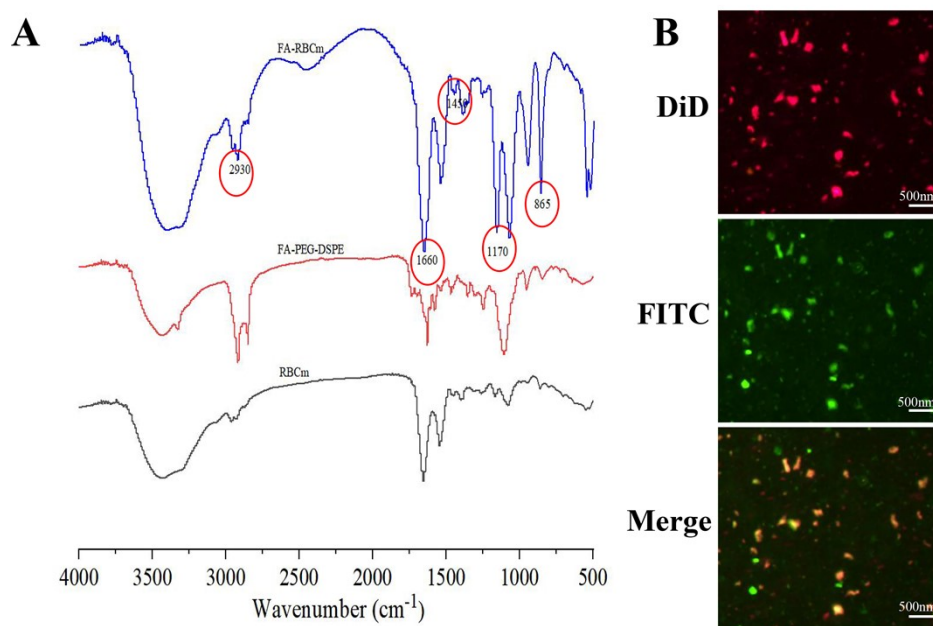

Figure S4. FT-IR spectrogram of RBCm, FA-PEG-DSPE, and FA-RBCm. (B) Confocal fluorescence images of RBCm and FA-RBCm (FITC-PEG-DSPE (FA), green; RBCm, red). Scale bar = 500 nm.

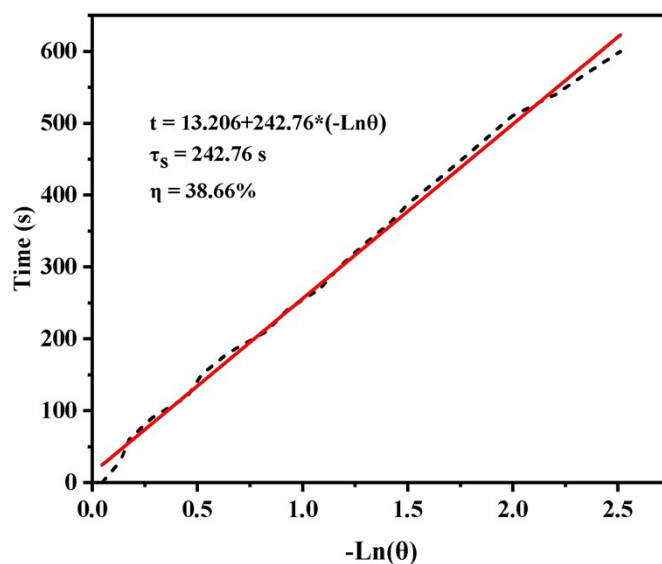

Figure S5 Linear time data versus  $-\ln\theta$  of Fe-PDA-EPI@FA-RBCm NPs obtained from the cooling period of Figure 2C.

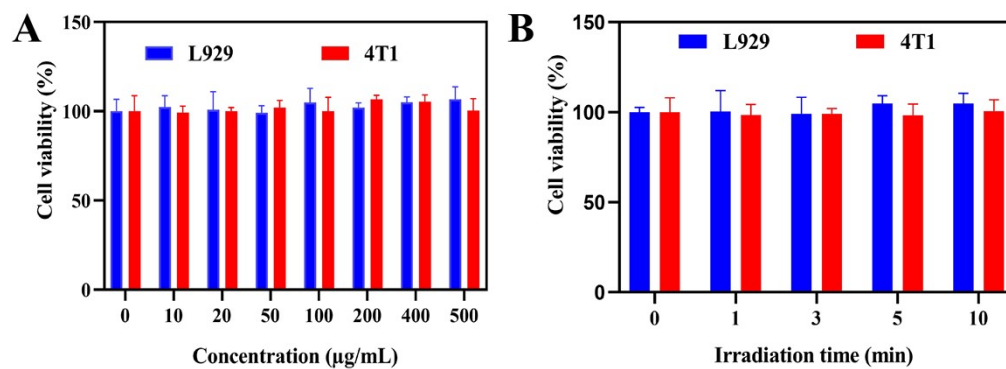

Figure S6. In vitro antitumor activity of blank Fe-PDA NPs and different laser irradiation time incubated with L929 (A) cells and 4T1 (B) cells for 48 h.

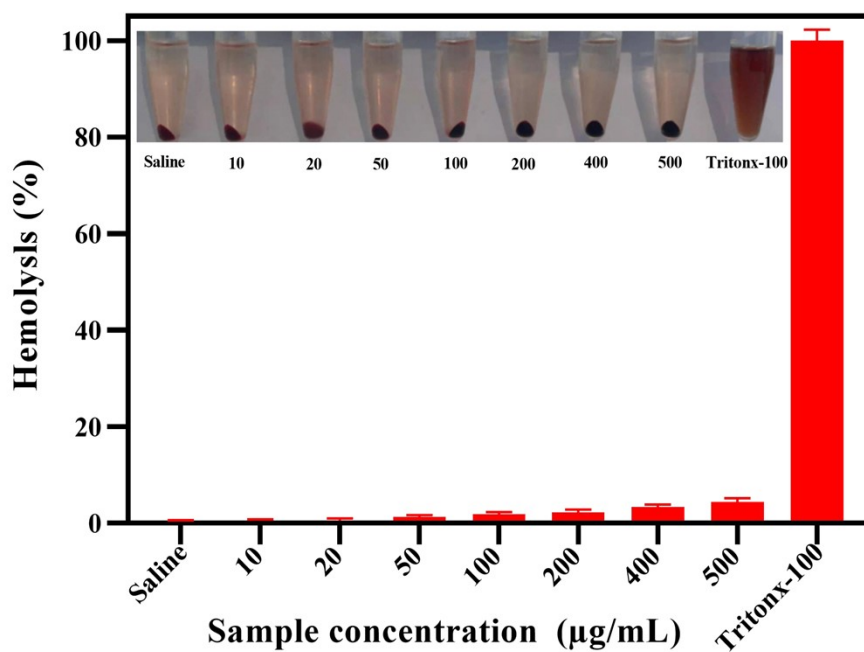

Figure S7. Hemolysis of Fe-PDA NPs with different concentration (0, 10, 20, 50, 100, 200, 400, 500 µg/mL) in RBCs suspension.

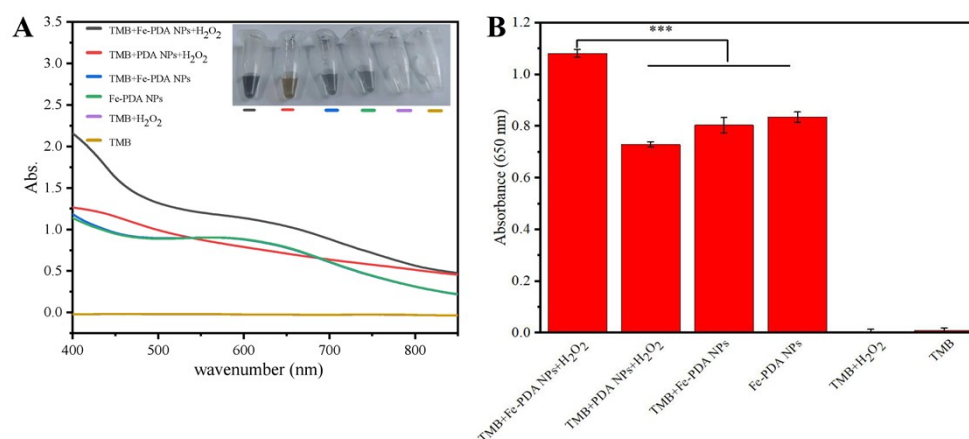

Figure S8. Peroxidation of the substrate under different conditions.

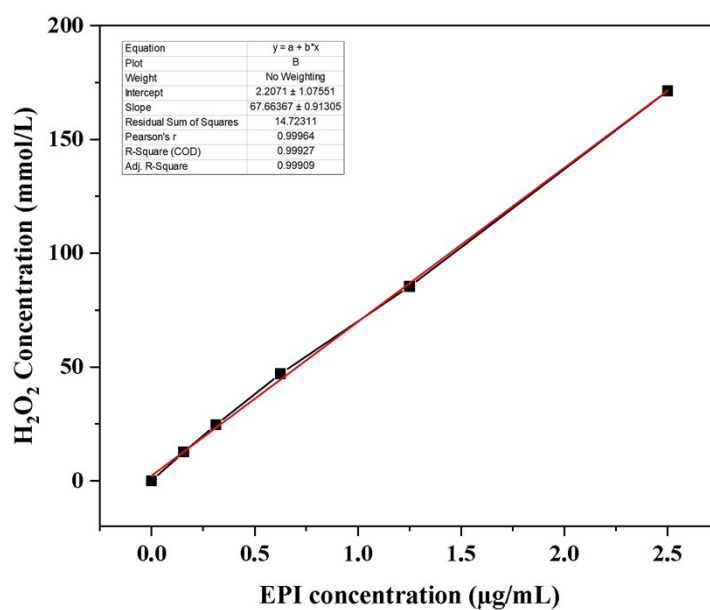

Figure S9. Intracellular H<sub>2</sub>O<sub>2</sub> levels in 4T1 cells after incubation with different concentrations of EPI for 24 h.

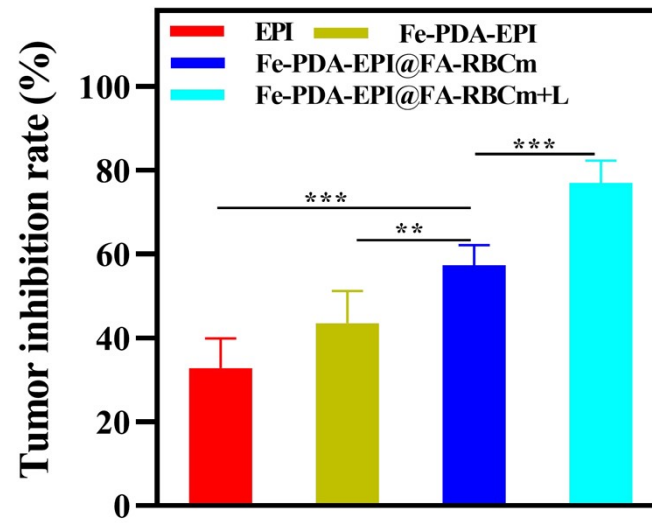

Figure S10. Tumor inhibition rate after different treatments.

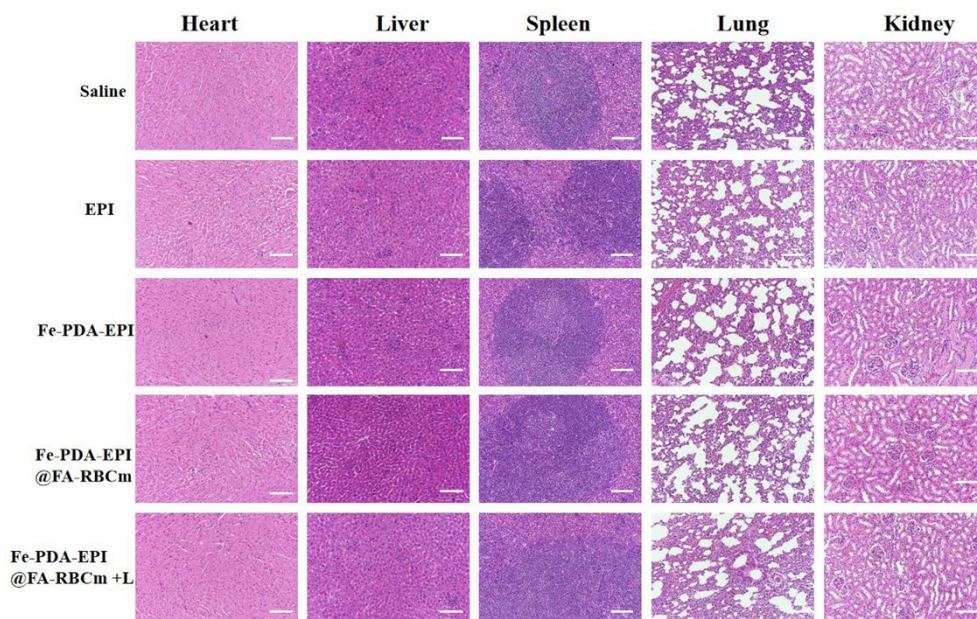

Figure S11. Histological images of major organs from 4T1 tumor-bearing mice after administration of different treatment groups. Tissue samples were stained with H&E and viewed under a light microscope.

Table S1 Characterization of drug-loaded nanoparticles with different ratios (Mean  $\pm$  SD, n = 3)

| Drugs:Carriers | Average<br>(nm) | Zeta<br>Potential<br>(mV) | PDI             | EE (%)           | DLC (%)          |
|----------------|-----------------|---------------------------|-----------------|------------------|------------------|
| 1:9            | 523.3 $\pm$ 4.5 | -7.8 $\pm$ 0.1            | 0.26 $\pm$ 0.03 | 83.90 $\pm$ 0.15 | 5.94 $\pm$ 0.57  |
| 2:8            | 173.3 $\pm$ 2.1 | -15.7 $\pm$ 0.5           | 0.08 $\pm$ 0.07 | 80.63 $\pm$ 0.12 | 16.78 $\pm$ 0.91 |
| 3:7            | 197.9 $\pm$ 2.4 | -17.0 $\pm$ 0.4           | 0.05 $\pm$ 0.03 | 70.80 $\pm$ 0.18 | 23.28 $\pm$ 0.78 |
| 4:6            | 127.7 $\pm$ 1.7 | -23.5 $\pm$ 2.7           | 0.30 $\pm$ 0.03 | 52.90 $\pm$ 0.15 | 26.04 $\pm$ 0.01 |
| 5:5            | 211.6 $\pm$ 7.5 | -12.1 $\pm$ 0.5           | 0.14 $\pm$ 0.03 | 35.72 $\pm$ 0.89 | 26.32 $\pm$ 0.11 |
